# Supplementary material
Source: MDPI journal article supplement (https://www.mdpi.com/search?q=molbank-2017-M954)
Supplement: s001 [file molbank-2017-M954-s001-mod.mol]

DHPM-MMF.mol
  ChemDraw08061709302D

  0  0  0     0  0              0 V3000
M  V30 BEGIN CTAB
M  V30 COUNTS 21 22 0 0 0
M  V30 BEGIN ATOM
M  V30 1 C 0.357235 -1.349243 0.000000 0
M  V30 2 C 0.357235 -2.174243 0.000000 0
M  V30 3 N 1.071706 -2.586743 0.000000 0
M  V30 4 C 1.786177 -2.174243 0.000000 0
M  V30 5 N 1.786177 -1.349243 0.000000 0
M  V30 6 C 1.071706 -0.936743 0.000000 0
M  V30 7 C -0.357235 -2.586743 0.000000 0
M  V30 8 C -0.357235 -0.936743 0.000000 0
M  V30 9 O -0.357235 -0.111743 0.000000 0
M  V30 10 O -1.071706 -1.349243 0.000000 0
M  V30 11 C -1.786178 -0.936743 0.000000 0
M  V30 12 C -2.500648 -1.349243 0.000000 0
M  V30 13 O 2.500648 -2.586743 0.000000 0
M  V30 14 C 1.071706 -0.111743 0.000000 0
M  V30 15 C 1.739145 0.373180 0.000000 0
M  V30 16 C 1.484206 1.157802 0.000000 0
M  V30 17 C 0.659206 1.157802 0.000000 0
M  V30 18 O 0.404267 0.373180 0.000000 0
M  V30 19 C 0.246706 1.872272 0.000000 0
M  V30 20 O -0.578294 1.872272 0.000000 0
M  V30 21 C -0.990794 2.586743 0.000000 0
M  V30 END ATOM
M  V30 BEGIN BOND
M  V30 1 2 1 2
M  V30 2 1 2 3
M  V30 3 1 3 4
M  V30 4 1 4 5
M  V30 5 1 5 6
M  V30 6 1 6 1
M  V30 7 1 2 7
M  V30 8 1 1 8
M  V30 9 2 8 9
M  V30 10 1 8 10
M  V30 11 1 10 11
M  V30 12 1 11 12
M  V30 13 2 4 13
M  V30 14 1 6 14
M  V30 15 2 14 15
M  V30 16 1 15 16
M  V30 17 2 16 17
M  V30 18 1 17 18
M  V30 19 1 18 14
M  V30 20 1 17 19
M  V30 21 1 19 20
M  V30 22 1 20 21
M  V30 END BOND
M  V30 END CTAB
M  END
